# Supplementary material for: Molecular associations of response to the new-generation BTK inhibitor zanubrutinib in marginal zone lymphoma
Source: PubMed Central journal article supplement — Blood Adv. 2023 Mar 25;7(14):3531–9. doi: 10.1182/bloodadvances.2022009412 (PMC10368859; doi:10.1182/bloodadvances.2022009412), 2023-03-25
Supplement: BLOODA_ADV-2022-009412-mmc2.pdf [file BLOODA_ADV-2022-009412-mmc2.pdf]

## Supplementary Methods

NGS library manufacture: DNA input for NGS library preparation was 45 to 50 ng. For cfDNA, this quantity was harvested from (on average) 8 mL STRECK plasma (i.e., two STRECK® blood collection tubes). Quality metrics on input DNA and library preparation was performed using Bioanalyzer or Agilent TapeStation reagents (Agilent Technologies, CA, USA).

Bioinformatic analysis: for WES analysis, mutations were discarded if they did not meet the following pre-specified criteria from *VarDict* output: quality score  $\geq 60$ , p-mean  $\geq 19.5$ , odds ratio 1-1.5, variant read depth  $\geq 6$  (reference to alternate 3:3) and variant allele frequency (VAF)  $\geq 5\%$ .<sup>1</sup> For mutations detected with VAF  $< 5\%$ , quality score cut-off was increased to  $\geq 100$ . Mutations with VAF  $< 3\%$  were discarded. For samples without a germline comparator, a population frequency of  $\geq 1\%$  as per Genome Aggregation databases (Gnomad, ESP6500, as accessed via OpenCRAVAT) was deemed a likely population single nucleotide polymorphism and therefore excluded.<sup>2</sup> The same curation rules were applied for the purposes of ctDNA analysis, although a VAF cut-off of  $\geq 0.2\%$  was used, or  $\geq 0.1\%$  if the mutation was present in the corresponding tumour sample or at a known hotspot (e.g., *MYD88* L265P).

BTK structural model: Human BTK kinase is a multi-domain protein composed of Pleckstrin-homology (PH) domain, Tec-homology (TH) domain, two Src-homology (SH) domains SH3 – SH2 and kinase domain. In order to explore spatial relationship between the zanubrutinib binding site and E41K mutation, the experimental structures of the separate domains of human BTK: PH-TH domain of human BTK (RCSB PDB: 1BWN), SH2 domain (RCSB PDB: 2GE9) and the kinase domain in complex with zanubrutinib (RCSB PDB: 6J6M) were superimposed on the theoretical model of full length BTK downloaded from the SWISS-MODEL server. This model of full length human BTK, in turn, is based on the construct PH-Kinase domain from bovine BTK crystal structure (RCSB PDB: 4Y93).

**References:**

1. Lai Z, Markovets A, Ahdesmaki M, et al. VarDict: a novel and versatile variant caller for next-generation sequencing in cancer research. *Nucleic Acids Res.* 2016;44(11):e108.
2. Pagel KA, Kim R, Moad K, et al. Integrated Informatics Analysis of Cancer-Related Variants. *JCO Clin Cancer Inform.* 2020;4:310-317.

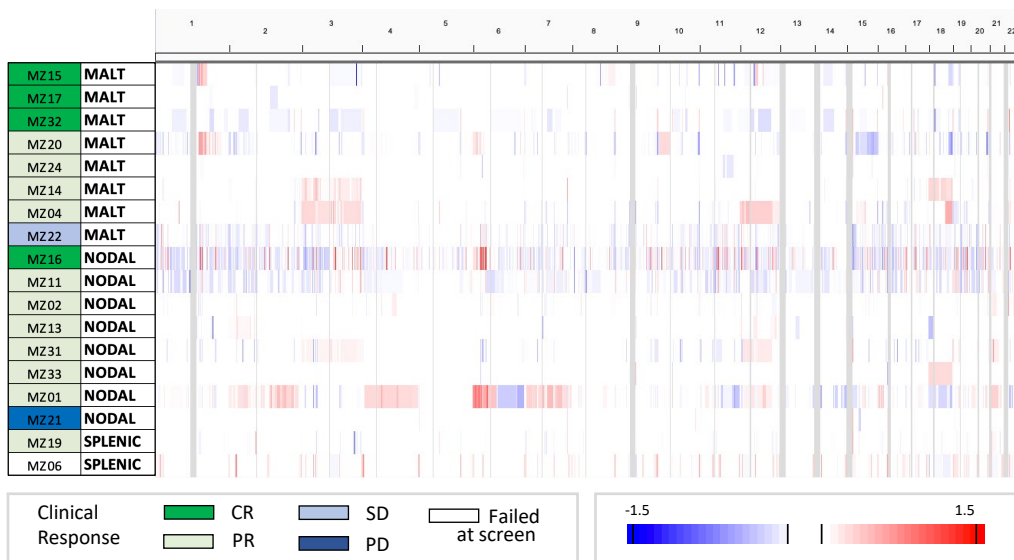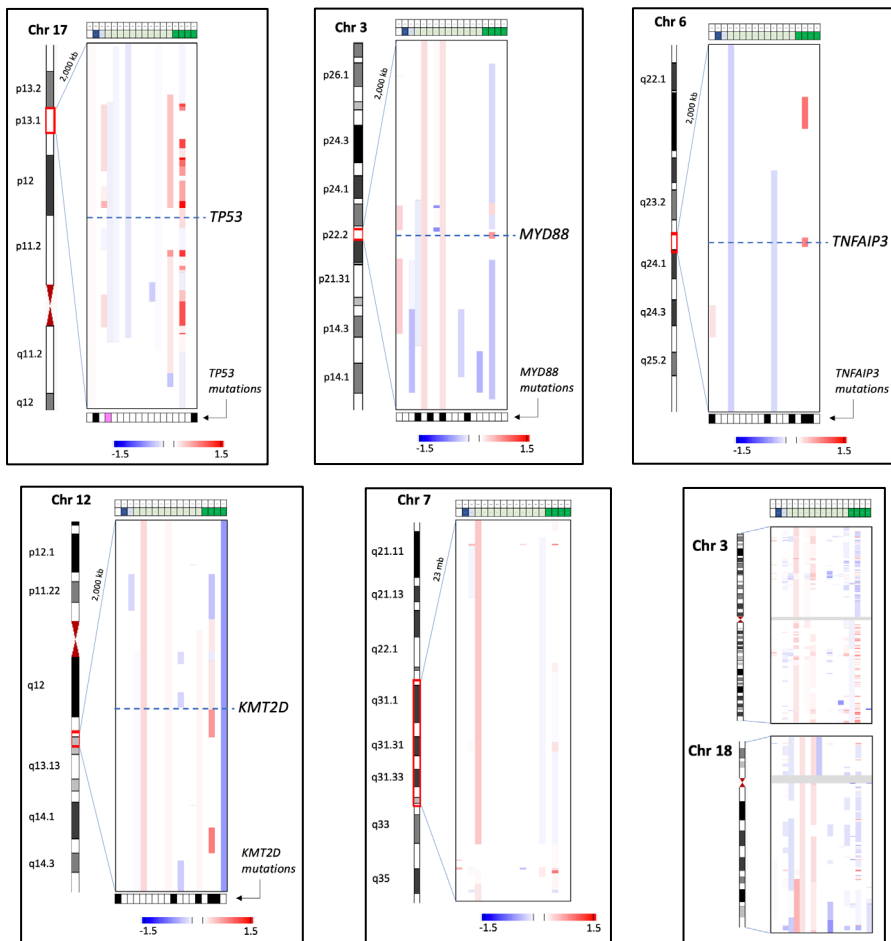

**Supplementary Figure 1.** CNV analysis from WES data. CNVkit was used to evaluate copy number changes for the 18 primary tumors investigated by WES. Data presented with corresponding histology type and zanubrutinib response. Enlarged regions shown for *TP53*, *MYD88*, *KMT2D*, *TNFAIP3*, Chromosome 7 q31-31 and (combined) Chromosome 3 and 18.

|                |               |                |                |
|----------------|---------------|----------------|----------------|
| <i>ARID3A</i>  | <i>DNAH10</i> | <i>IL20RA</i>  | <i>NOTCH2</i>  |
| <i>ATM</i>     | <i>DTX1</i>   | <i>ITCH</i>    | <i>PLCG2</i>   |
| <i>BCL10</i>   | <i>EP300</i>  | <i>KLF2</i>    | <i>PRKDC</i>   |
| <i>BIRC3</i>   | <i>FAS</i>    | <i>KLHL6</i>   | <i>PTPRD</i>   |
| <i>BTK</i>     | <i>FAT1</i>   | <i>KMT2D</i>   | <i>RBPJL</i>   |
| <i>CACNA1H</i> | <i>FAT3</i>   | <i>MAML2</i>   | <i>REL</i>     |
| <i>CARD11</i>  | <i>FAT4</i>   | <i>MAP3K14</i> | <i>SPEN</i>    |
| <i>CCND3</i>   | <i>FBXO11</i> | <i>MYD88</i>   | <i>SWAP70</i>  |
| <i>CD79A</i>   | <i>FBXW7</i>  | <i>NCOR2</i>   | <i>TBL1XR1</i> |
| <i>CD79B</i>   | <i>GPS2</i>   | <i>NFKB1</i>   | <i>TNFAIP3</i> |
| <i>CREBBP</i>  | <i>IGLL5</i>  | <i>NFKBIA</i>  | <i>TP53</i>    |
| <i>CXCR4</i>   | <i>IKBKB</i>  | <i>NOTCH1</i>  | <i>TRAF3</i>   |

**Supplementary Table 1.** Candidate genes.

| Study ID | Age | Sex | Subtype | Prior lines of therapy | Tumour sample site           | Best response | Progression | PFS (months) |
|----------|-----|-----|---------|------------------------|------------------------------|---------------|-------------|--------------|
| MZ01     | 71  | M   | NODAL   | 2                      | Lymph node                   | PR            | N           | 16.54        |
| MZ02     | 64  | M   | NODAL   | 2                      | Bone marrow trephine         | PR            | N           | 11.51        |
| MZ04     | 80  | F   | MALT    | 3                      | Lung                         | PR            | N           | 16.37        |
| MZ06     | 86  | F   | SPLENIC | 2                      | Bone marrow trephine         | Screen fail   | NA          | NA           |
| MZ11     | 78  | M   | NODAL   | 1                      | Lymph node                   | PR            | N           | 16.34        |
| MZ13     | 52  | F   | NODAL   | 2                      | Lymph node                   | PR            | N           | 11.05        |
| MZ14     | 61  | M   | MALT    | 1                      | Soft tissue (right triceps)  | PR            | N           | 16.57        |
| MZ15     | 72  | M   | MALT    | 1                      | Soft tissue (lacrimal gland) | CR            | N           | 10.95        |
| MZ16     | 71  | M   | NODAL   | 1                      | Soft tissue (left trapeze)   | CR            | N           | 10.85        |
| MZ17     | 37  | M   | MALT    | 1                      | Stomach, Lymph node          | CR            | N           | 16.80        |
| MZ19     | 81  | F   | SPLENIC | 3                      | Skin                         | PR            | Y           | 5.33         |
| MZ20     | 83  | M   | MALT    | 1                      | Soft tissue (Orbital)        | PR            | Y           | 8.68         |
| MZ21     | 68  | F   | NODAL   | 4                      | Lymph node                   | PD            | Y           | 2.76         |
| MZ22     | 72  | M   | MALT    | 2                      | Stomach                      | SD            | Y           | 11.08        |
| MZ24     | 68  | F   | MALT    | 1                      | Bone marrow aspirate         | PR            | N           | 16.73        |
| MZ31     | 65  | M   | NODAL   | 1                      | Lymph node                   | PR            | N*          | 13.40        |
| MZ32     | 82  | M   | MALT    | 2                      | Lung                         | CR            | N           | 10.88        |
| MZ33     | 40  | M   | NODAL   | 1                      | Lymph node                   | PR            | N           | 11.05        |

\*COVID-19 related death

**Supplementary Table 2.** Characteristics of patients who underwent WES of tumor sample.
